# Supplementary material for: Superspreading of SARS-CoV-2 in the USA
Source: PLOS journal article supplement (doi:10.1371/journal.pone.0248808), 2021-03-25
Supplement: S2 (10.1371/journal.pone.0248808.s002) [file journal.pone.0248808.s002]

## Appendix S2: Variance in $\mu_\beta$ .

It is reasonable to question whether the calculated variance,  $\sigma_\beta^2$ , is a result of various geographic locations having differing average infectiousness,  $\mu_\beta$ , due to varying population density, social norms, etc. One may instead consider that the mean infectiousness  $\mu_\beta$  follows some distribution  $q(\mu_\beta)$  among different counties. For a given  $\mu_\beta$ , we have shown that the variance in  $P(n; \mu_\beta, \sigma_\beta)$  averaged over  $I$  realizations is given by  $(\mu_\beta^2 + \sigma_\beta^2)/I$  in the exponential case. Including the effect of a distribution  $q(\mu_\beta)$ , we calculate the variance in  $\Delta I/I$  to be:

$$\begin{aligned} \text{Var}\left(\frac{\Delta I}{I}\right) &= \sum_{n=0}^{\infty} (n - \bar{\mu}_\beta)^2 \int_0^{\infty} d\mu_\beta q(\mu_\beta) P(n; \mu_\beta, \sigma_\beta) \\ &= \int_0^{\infty} d\mu_\beta q(\mu_\beta) \sum_{n=0}^{\infty} (n - \bar{\mu}_\beta)^2 P(n; \mu_\beta, \sigma_\beta) \\ &= \int_0^{\infty} d\mu_\beta q(\mu_\beta) \left( (\mu_\beta - \bar{\mu}_\beta)^2 + \frac{\mu_\beta + \sigma_\beta^2}{I} \right) \\ &= \text{Var}(q(\mu_\beta)) + \frac{\bar{\mu}_\beta + \sigma_\beta^2}{I} \end{aligned}$$

That is, when we account for the possibility that each region has a different  $\mu_\beta$ , the value of  $\mu_\beta$  is replaced by its mean  $\bar{\mu}_\beta$  across counties, and a constant term is added for the variance in  $\mu_\beta$  across counties. We can conclude that this variance cannot fully explain the data for two reasons. First, we observe a clear  $\text{Var}(\Delta I/I) \sim 1/I$  trend in the data (Fig 2), which can only be a result of the variance in  $p(\beta)$  rather than  $q(\mu_\beta)$ . Additionally, we can directly measure the variance in  $\mu_\beta$  across counties, which we find to be  $0.007 \text{ (cases/day)}^2$ . This number is too small to significantly affect the total variance in  $\Delta I/I$ , as seen in Fig 2. When the measured variance in  $q(\mu_\beta)$  is taken into account in our fitting procedure, we find that  $\bar{\mu}_\beta = 0.18 \text{ cases/day}$ ,  $\sigma_\beta \gtrsim 0.58 \text{ cases}^2/\text{days}^2$ , resulting in very slightly different value of  $\sigma_\beta/\mu_\beta \gtrsim 3.1$ .

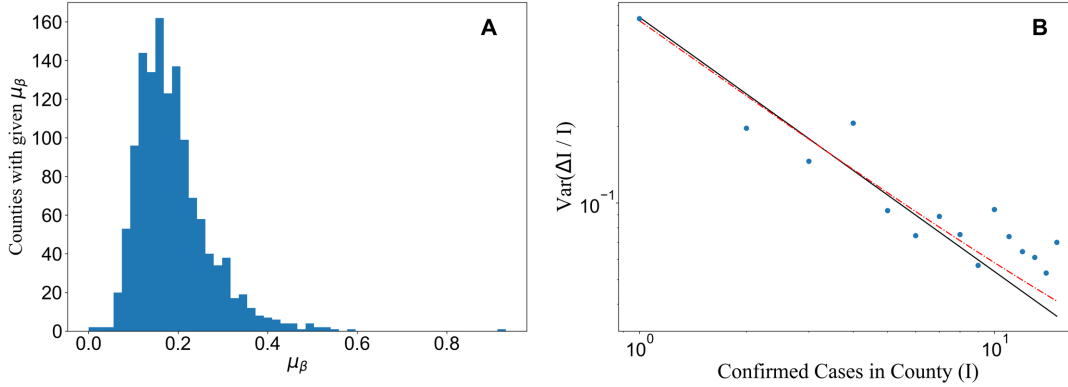

**Fig 2.** (a) The calculated value of the mean infectiousness,  $\mu_\beta$ , for each individual county (with at least five cases). The variance in  $\mu_\beta$  is relatively small:  $\text{Var}(\mu_\beta) = 0.0068 \text{ (cases/day)}^2 \ll \sigma_\beta^2$ . (b) When we account for this consideration (dashed red line), the fitted value of  $\sigma_\beta^2$  decreases from  $0.35 \rightarrow 0.33 \text{ (cases/day)}^2$ . This adjustment does not significantly affect our conclusions.
