# Supplementary material for: Superspreading of SARS-CoV-2 in the USA
Source: PLOS journal article supplement (doi:10.1371/journal.pone.0248808), 2021-03-25
Supplement: S4 (10.1371/journal.pone.0248808.s004) [file journal.pone.0248808.s004]

## Appendix S4: Variance in testing.

We have shown that a fixed detection rate,  $p_{\text{det}}$ , across counties cannot account for the variance observed within the US population. However, one can also check to ensure that variation in  $p_{\text{det}}$  between counties, described by a probability distribution  $q(p_{\text{det}})$ , does not explain the data either. To account for differing values of  $p_{\text{det}}$  we weight Eq (4) by  $q(p_{\text{det}})$  so that  $P(\Delta I_{\text{det}}; \Delta I) \rightarrow \int_0^1 dp_{\text{det}} q(p_{\text{det}}) P(\Delta I_{\text{det}}; \Delta I)$ . Plugging into Eg. (7) we see

$$\text{Var} \left( \frac{\Delta I_{\text{det}}}{I_{\text{det}}} \right) = \frac{\mu_{\beta} + \mu_{\beta}^2(1 - \overline{p_{\text{det}}}) + \overline{p_{\text{det}}} \sigma_{\beta}^2}{I_{\text{det}}} \quad (8)$$

where  $\overline{p_{\text{det}}}$  is the mean detection rate across all counties when they have  $I_{\text{det}}$  cases. This expression shows that the variance in the exponential growth rate  $(\Delta I_{\text{det}})/I_{\text{det}}$  only depends on the mean detection rate at a given  $I_{\text{det}}$  rather than its variance. Furthermore, averaging  $p_{\text{det}}$  across counties at various times (but the same  $I_{\text{det}}$ ) will average out any effects from cyclical weekly reporting patterns. To observe how this impacts our calculation for  $\sigma_{\beta}^2$ , we rearrange Eq. (8) to obtain:

$$\sigma_{\beta}^2 = \frac{\text{Var} \left( \frac{\Delta I_{\text{det}}}{I_{\text{det}}} \right) I_{\text{det}} - \mu_{\beta} - \mu_{\beta}^2(1 - \overline{p_{\text{det}}})}{\overline{p_{\text{det}}}} = \frac{\sigma_{\beta, p_{\text{det}}=1}^2 - \mu_{\beta}^2(1 - \overline{p_{\text{det}}})}{\overline{p_{\text{det}}}} \quad (9)$$

where  $\sigma_{\beta, p_{\text{det}}=1}^2$  is the variance we calculate in the main text assuming  $\overline{p_{\text{det}}} = 1$ . Since  $\mu_{\beta}^2(1 - \overline{p_{\text{det}}}) \ll \sigma_{\beta, p_{\text{det}}=1}^2$ , it is clear that accounting for a imperfect detection rate can only increase the variance in infectiousness. Therefore, if  $\overline{p_{\text{det}}} < 1$  this makes our calculation a lower bound on  $\sigma_{\beta}^2$ . Further, if we use the percentage of asymptomatic cases, 40% [D1], as a rough estimate for the mean percentage of undetected cases, then  $\mu_{\beta}$  remains unchanged while  $\sigma_{\beta}$  increases from 0.59 cases/day to 0.75 cases/day. This change in the variance corresponds to a significant increase in superspreading as the percentage of new infections cause by the top 5% of infectious cases rises from 61.7% to 74.0%. While this exercise provides some insight into how large  $\sigma_{\beta}$  could be, it is not a rigorous upper bound. Firstly, there remains significant uncertainty in the percentage of asymptomatic cases as estimates range from 8.2% to 75% [D2]. Additionally, there remain other complications, such as incubation period variation and cross-county interactions, which would increase the variance further.

## D References

- [D1] COVID-19 Pandemic Planning Scenarios. CDC. 2020; <https://www.cdc.gov/coronavirus/2019-ncov/hcp/planning-scenarios-h.pdf>.
- [D2] Yanes-Lane M, Winters N, Fregonese F, Bastos M, Perlman-Arrow S, Campbell JR, et al. Proportion of asymptomatic infection among COVID-19 positive persons and their transmission potential: A systematic review and meta-analysis. PLOS ONE. 2020;15(11):1–21. doi:10.1371/journal.pone.0241536.
